CORRECTION

# Correction: Polyglutamine- and Temperature-Dependent Conformational Rigidity in Mutant Huntingtin Revealed by Immunoassays and Circular Dichroism Spectroscopy

The *PLOS ONE* Staff

In the Methods section, Equation 2b is incorrect. The correct equation is:  $\theta_H = (-44,000 + 250T)(1 - 3/N_r)$

## Reference

1. Fodale V, Kegulian NC, Verani M, Cariulo C, Azzollini L, Petricca L, et al. (2014) Polyglutamine- and Temperature-Dependent Conformational Rigidity in Mutant Huntingtin Revealed by Immunoassays and Circular Dichroism Spectroscopy. PLoS ONE 9(12): e112262. doi: [10.1371/journal.pone.0112262](https://doi.org/10.1371/journal.pone.0112262) PMID: [25464275](https://pubmed.ncbi.nlm.nih.gov/25464275/)

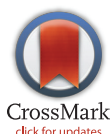

## OPEN ACCESS

**Citation:** The *PLOS ONE* Staff (2015) Correction: Polyglutamine- and Temperature-Dependent Conformational Rigidity in Mutant Huntingtin Revealed by Immunoassays and Circular Dichroism Spectroscopy. PLoS ONE 10(6): e0129986. doi:10.1371/journal.pone.0129986

**Published:** June 3, 2015

**Copyright:** © 2015 The PLOS ONE Staff. This is an open access article distributed under the terms of the [Creative Commons Attribution License](https://creativecommons.org/licenses/by/4.0/), which permits unrestricted use, distribution, and reproduction in any medium, provided the original author and source are credited.
